# Supplementary material for: Age of Diagnosis, Fidelity and Acceptability of an Early Diagnosis Clinic for Cerebral Palsy: A Single Site Implementation Study
Source: MDPI journal article supplement (doi:10.3390/brainsci11081074), 2021-08-16
Supplement: s1 [file s1]

**Table S1.** Standards for Reporting Implementation Studies: the StaRI checklist [1].

| Checklist item       |   | Reported on page #     | Implementation Strategy                                                                                                                                                                                                     | Reported on page #                          | Intervention                                                                                                                                                                                   |
|----------------------|---|------------------------|-----------------------------------------------------------------------------------------------------------------------------------------------------------------------------------------------------------------------------|---------------------------------------------|------------------------------------------------------------------------------------------------------------------------------------------------------------------------------------------------|
|                      |   |                        | “Implementation strategy” refers to how the intervention was implemented                                                                                                                                                    |                                             | “Intervention” refers to the healthcare or public health intervention that is being implemented.<br><br>International Clinical Guideline on the Early and Accurate Diagnosis of Cerebral Palsy |
| Title and abstract   |   |                        |                                                                                                                                                                                                                             |                                             |                                                                                                                                                                                                |
| Title                | 1 | Page 1                 | Identification as an implementation study, and description of the methodology in the title and/or keywords                                                                                                                  |                                             |                                                                                                                                                                                                |
| Abstract             | 2 | Page 1                 | Identification as an implementation study, including a description of the implementation strategy to be tested, the evidence-based intervention being implemented, and defining the key implementation and health outcomes. |                                             |                                                                                                                                                                                                |
| Introduction         |   |                        |                                                                                                                                                                                                                             |                                             |                                                                                                                                                                                                |
| Introduction         | 3 | Page 1                 | Description of the problem, challenge or deficiency in healthcare or public health that the intervention being implemented aims to address.                                                                                 |                                             |                                                                                                                                                                                                |
| Rationale            | 4 | Page 2 + Supp Table S2 | The scientific background and rationale for the implementation strategy (including any underpinning theory/framework/model, how it is expected to achieve its effects and any pilot work).                                  | Page 1-2 – International Clinical Guideline | The scientific background and rationale for the intervention being implemented (including evidence about its effectiveness and how it is expected to achieve its effects).                     |
| Aims and objectives  | 5 | Page 2                 | The aims of the study, differentiating between implementation objectives and any intervention objectives.                                                                                                                   |                                             |                                                                                                                                                                                                |
| Methods: description |   |                        |                                                                                                                                                                                                                             |                                             |                                                                                                                                                                                                |

|                     |    |                        |                                                                                                                                                                                                  |         |                                                                                                                                                       |
|---------------------|----|------------------------|--------------------------------------------------------------------------------------------------------------------------------------------------------------------------------------------------|---------|-------------------------------------------------------------------------------------------------------------------------------------------------------|
| Design              | 6  | Page 3                 | The design and key features of the evaluation, (cross referencing to any appropriate methodology reporting standards) and any changes to study protocol, with reasons                            |         |                                                                                                                                                       |
| Context             | 7  | Page 5 (site)          | The context in which the intervention was implemented. (Consider social, economic, policy, healthcare, organisational barriers and facilitators that might influence implementation elsewhere).  |         |                                                                                                                                                       |
| Targeted ‘sites’    | 8  | Page 4 (site)          | The characteristics of the targeted ‘site(s)’ (e.g locations/personnel/resources etc.) for implementation and any eligibility criteria.                                                          | Page 4  | The population targeted by the intervention and any eligibility criteria.                                                                             |
| Description         | 9  | Page 3 + Supp Table S2 | A description of the implementation strategy                                                                                                                                                     | Table 1 | A description of the intervention                                                                                                                     |
| Sub-groups          | 10 | N/A                    | Any sub-groups recruited for additional research tasks, and/or nested studies are described                                                                                                      |         |                                                                                                                                                       |
| Methods: evaluation |    |                        |                                                                                                                                                                                                  |         |                                                                                                                                                       |
| Outcomes            | 11 | Page 5                 | Defined pre-specified primary and other outcome(s) of the implementation strategy, and how they were assessed. Document any pre-determined targets                                               | Page 5  | Defined pre-specified primary and other outcome(s) of the intervention (if assessed), and how they were assessed. Document any pre-determined targets |
| Process evaluation  | 12 | Supp Table S2          | Process evaluation objectives and outcomes related to the mechanism by which the strategy is expected to work                                                                                    |         |                                                                                                                                                       |
| Economic evaluation | 13 | N/A                    | Methods for resource use, costs, economic outcomes and analysis for the implementation strategy                                                                                                  | N/A     | Methods for resource use, costs, economic outcomes and analysis for the intervention                                                                  |
| Sample size         | 14 | Page 3                 | Rationale for sample sizes (including sample size calculations, budgetary constraints, practical considerations, data saturation, as appropriate)                                                |         |                                                                                                                                                       |
| Analysis            | 15 | Page 5                 | Methods of analysis (with reasons for that choice)                                                                                                                                               |         |                                                                                                                                                       |
| Sub-group analyses  | 16 | N/A                    | Any a priori sub-group analyses (e.g. between different sites in a multicentre study, different clinical or demographic populations), and sub-groups recruited to specific nested research tasks |         |                                                                                                                                                       |

| Results               |    |                        |                                                                                                                                 |                       |                                                                                                                         |
|-----------------------|----|------------------------|---------------------------------------------------------------------------------------------------------------------------------|-----------------------|-------------------------------------------------------------------------------------------------------------------------|
| Characteristics       | 17 | Page 4 (site)          | Proportion recruited and characteristics of the recipient population for the implementation strategy                            | Page 5 + Table 2      | Proportion recruited and characteristics (if appropriate) of the recipient population for the intervention              |
| Outcomes              | 18 | Page 6 + Table 3,4 &5  | Primary and other outcome(s) of the implementation strategy                                                                     | Page 6 + Table 3,4 &5 | Primary and other outcome(s) of the Intervention (if assessed)                                                          |
| Process outcomes      | 19 | Supp Table S2          | Process data related to the implementation strategy mapped to the mechanism by which the strategy is expected to work           |                       |                                                                                                                         |
| Economic evaluation   | 20 | N/A                    | Resource use, costs, economic outcomes and analysis for the implementation strategy                                             | N/A                   | Resource use, costs, economic outcomes and analysis for the intervention                                                |
| Sub-group analyses    | 21 | N/A                    | Representativeness and outcomes of subgroups including those recruited to specific research tasks                               |                       |                                                                                                                         |
| Fidelity/ adaptation  | 22 | Page 7 + Supp Table S2 | Fidelity to implementation strategy as planned and adaptation to suit context and preferences                                   | Page 7                | Fidelity to delivering the core components of intervention (where measured)                                             |
| Contextual changes    | 23 | N/A                    | Contextual changes (if any) which may have affected outcomes                                                                    |                       |                                                                                                                         |
| Harms                 | 24 | Page 9                 | All important harms or unintended effects in each group                                                                         |                       |                                                                                                                         |
| Discussion            |    |                        |                                                                                                                                 |                       |                                                                                                                         |
| Structured discussion | 25 | Page 9                 | Summary of findings, strengths and limitations, comparisons with other studies, conclusions and implications                    |                       |                                                                                                                         |
| Implications          | 26 | Pages 9-11             | Discussion of policy, practice and/or research implications of the implementation strategy (specifically including scalability) | Pages 9-11            | Discussion of policy, practice and/or research implications of the intervention (specifically including sustainability) |

| General    |    |         |                                                                                                                                                                                                                                           |
|------------|----|---------|-------------------------------------------------------------------------------------------------------------------------------------------------------------------------------------------------------------------------------------------|
| Statements | 27 | Page 12 | Include statement(s) on regulatory approvals (including, as appropriate, ethical approval, confidential use of routine data, governance approval), trial/study registration (availability of protocol), funding and conflicts of interest |

**Table S2.** Barriers, Facilitators with Corresponding Knowledge Translation Strategies of Early Diagnosis Clinic.

| Barriers and facilitators to implementation of guideline                                                                                                                                                                                                                                         | Knowledge translation strategies used in design of Early Diagnosis Clinic                                                                                                                                                                                                                                                                                                                | Adaptations of knowledge translation interventions for study                                                                                                                                                   | How knowledge translation strategy is expected to achieve its effects                                                                                                                                                                                                                                                                                              |
|--------------------------------------------------------------------------------------------------------------------------------------------------------------------------------------------------------------------------------------------------------------------------------------------------|------------------------------------------------------------------------------------------------------------------------------------------------------------------------------------------------------------------------------------------------------------------------------------------------------------------------------------------------------------------------------------------|----------------------------------------------------------------------------------------------------------------------------------------------------------------------------------------------------------------|--------------------------------------------------------------------------------------------------------------------------------------------------------------------------------------------------------------------------------------------------------------------------------------------------------------------------------------------------------------------|
| <p><b>Barrier - Practitioner attitudes</b></p> <p>Healthcare professionals' attitude at major health institutions in NSW that CP could not accurately be diagnosed under 12 months of age</p>                                                                                                    | <p>Targeted <b>practitioner attitudes</b> by explicit training of predictive value of GMA and HINE (tools to predict CP)</p> <p>Feedback loop to referring clinicians of diagnostic outcome and intervention pathways for infants referred to Early Diagnosis Clinic</p> <p>Neurologists from NSW Health targeted for referrals</p>                                                      | <p>Ensured referral pathways and early intervention services available for infants identified with CP or high risk of CP for referring practitioners to trust something could be done for referred infants</p> | <p><b>Practitioner perception, attitude and beliefs</b> about evidence-based practice are predictors of evidence-based practice use in health practitioners [2]</p>                                                                                                                                                                                                |
| <p>Healthcare professionals concerned about upsetting parents unnecessarily when they feel nothing can be done for infants</p>                                                                                                                                                                   | <p>Improved <b>guideline awareness</b> used explicit teaching of guidelines at the time of publication e.g. presented at major teaching hospital Grand Rounds and explicit education to targeted audiences at industry conferences</p>                                                                                                                                                   |                                                                                                                                                                                                                | <p>Awareness of the existence of a clinical guideline, including guideline content, affects implementation [3]</p>                                                                                                                                                                                                                                                 |
| <p><b>Barriers</b></p> <ol style="list-style-type: none"> <li>Referrers unsure if a diagnosis of CP should be made for borderline cases</li> <li>Referrers unsure of which babies to fast track for CP diagnosis</li> <li>Referrers unsure or untrained in use of best practice tools</li> </ol> | <ol style="list-style-type: none"> <li><b>Knowledge brokers</b> were identified and trained as staff on the clinic team to feedback and coach referrers regarding outcome of diagnosis.</li> <li><b>Knowledge brokers</b> used early diagnosis evidence to inform policy and decision makers within both collaborating institutions (Cerebral Palsy Alliance and NSW Health);</li> </ol> | <p>Existing <b>Community of Practice</b>, NSW GMA rater network reliability days were adapted to include discussion about early detection of CP rather than just GMA video scoring</p>                         | <p><b>Knowledge brokers</b> work one on one with decision makers to facilitate evidence-informed decision making. [4] It is likely that knowledge brokers need to work in conjunction with a <b>community of practice</b> to be successful [4]. In order for knowledge brokerage to be most effective knowledge needs to be given to the right decision maker.</p> |

|                                                                                                                                                                                                                                                                               |                                                                                                                                                                                                                                                                                                                                                       |                                                                                                                                                                                           |                                                                                                                                                                                                                                                                                                        |
|-------------------------------------------------------------------------------------------------------------------------------------------------------------------------------------------------------------------------------------------------------------------------------|-------------------------------------------------------------------------------------------------------------------------------------------------------------------------------------------------------------------------------------------------------------------------------------------------------------------------------------------------------|-------------------------------------------------------------------------------------------------------------------------------------------------------------------------------------------|--------------------------------------------------------------------------------------------------------------------------------------------------------------------------------------------------------------------------------------------------------------------------------------------------------|
|                                                                                                                                                                                                                                                                               | 3. Clinic staff linked with members of existing community of practice, the NSW GMA rater network, who were likely to be referrers to clinic and key decision makers                                                                                                                                                                                   |                                                                                                                                                                                           |                                                                                                                                                                                                                                                                                                        |
| <b>Barrier: Identified Gaps in Healthcare Service</b><br>1. Gap: No service to capture infants with risk for CP who were not seen in NICU follow up clinics<br>2. Gap: No service which focused on specifically on early diagnosis of CP<br>3. Gap: personnel to staff clinic | 1. Creation of a new service to fill gap<br>2. <b>Opinion Leaders:</b> A team of multi-disciplinary opinion leaders targeted to staff the clinic and develop the Early Diagnosis Clinic to meet the identified service gap<br>3. <b>Mentoring</b> of clinic staff by industry experts and mentoring clinic staff of clinicians in the wider CP field. | Utilisation of opinion leaders to make use of GMA standard of care in NSW NICU follow up clinics [5,6] had previously been successful, but a new clinic was required to fill service gap. | Use of <b>opinion leader strategy</b> as a part of a multifaceted implementation strategy increases the evidence to practice uptake by 10% (median risk difference = +0.10) [7]                                                                                                                        |
| <b>Healthcare Barrier</b><br>1. Healthcare clinicians did not believe parents who had concern about their child's development or felt a "wait and see approach" was required to see if an infant should be referred for diagnosis process                                     | 1. A top down (medical referral) and bottom up [8] (parent referral to clinic) would be more likely to capture infants, particularly in the infant detectable risks group. Most parents suspect CP before a diagnosis is made [9]                                                                                                                     | Parent referral accepted (with supporting medical referral for Medicare billing)                                                                                                          | Patient (parent)-mediated knowledge translation strategies improve population health outcomes [10]                                                                                                                                                                                                     |
| <b>System Facilitator</b><br>1. Research active implementing organisations (Cerebral Palsy Alliance and NSW Health)                                                                                                                                                           | 1. Best use made of current <b>research active</b> culture at Cerebral Palsy Alliance and NSW Health (implementing organisations)<br>2. Continued investment in research active culture at implementing organisations                                                                                                                                 | Employed research clinicians on clinic team                                                                                                                                               | Involvement in research activities are a significant predictor of self-reported research evidence use in health practitioners [2].<br><br>Investment in research culture in an organisation is associated with improved outcomes (mortality), organisational efficiency and patient satisfaction [11]. |
| <b>Healthcare Barrier</b><br>6 months wait time to see neurologist in public health care system in Southwest Sydney                                                                                                                                                           | 1. <b>Employment of neurologist</b> from NSW Health to lead Early Diagnosis Clinic team. Research work included in position                                                                                                                                                                                                                           |                                                                                                                                                                                           | A responsive service with short wait time will encourage clinicians to refer to this service                                                                                                                                                                                                           |

Abbreviations: CP, cerebral palsy; GMA; General Movements Assessment; HINE, Hammersmith Infant Neurological Examination; NICU, Neonatal Intensive Care Unit; NSW, New South Wales. \*Table based on Standards for Reporting Implementation Studies (StaRI) [1].

---

## References

1. Pinnock, H.; Barwick, M.; Carpenter, C.R.; Eldridge, S.; Grandes, G.; Griffiths, C.J.; Rycroft-Malone, J.; Meissner, P.; Murray, E.; Patel, A.; et al. Standards for Reporting Implementation Studies (StaRI) Statement. *BMJ* **2017**, *356*, doi:10.1136/bmj.i6795.
2. Lizarondo, L.; Grimmer-Somers, K.; Kumar, S. A systematic review of the individual determinants of research evidence use in allied health. *J. Multidiscip. Healthc.* **2011**, *4*, 261–272, doi:10.2147/JMDH.S23144.
3. Francke, A.L.; Smit, M.C.; de Veer, A.J.E.; Mistiaen, P. Factors influencing the implementation of clinical guidelines for health care professionals: A systematic meta-review. *BMC Med. Inform. Decis. Mak.* **2008**, *8*, 38–38, doi:10.1186/1472-6947-8-38.
4. Dobbins, M.; Hanna, S.; Ciliska, D.; Manske, S.; Cameron, R.; Mercer, S.; O'Mara, L.; Decorby, K.; Robeson, P. A randomized controlled trial evaluating the impact of knowledge translation and exchange strategies. *Implementat. Sci.* **2009**, *4*, doi:10.1186/1748-5908-4-61.
5. Goyen, T.-A.; Morgan, C.; Crowle, C.; Hardman, C.; Day, R.; Novak, I.; Badawi, N. Sensitivity and specificity of general movements assessment for detecting cerebral palsy in an Australian context: 2-year outcomes. *J. Paediatr. Child. Health* **2020**, *56*, 1414–1418, doi:10.1111/jpc.14953.
6. Crowle, C.; Badawi, N.; Walker, K.; Novak, I. General Movements Assessment of infants in the neonatal intensive care unit following surgery. *J. Paediatr. Child. Health* **2015**, *51*, 1007–1011, doi:10.1111/jpc.12886.
7. Flodgren, G.; Parmelli, E.; Doumit, G.; Gattellari, M.; O'Brien, M.A.; Grimshaw, J.; Eccles, M.P. Local opinion leaders: Effects on professional practice and health care outcomes. *Cochrane Database Syst. Rev.* **2011**, *8*, CD000125, doi:10.1002/14651858.CD000125.pub4.
8. Proctor, E.; Landsverk, J.; Aarons, G.; Chambers, D.; Glisson, C.; Mittman, B. Implementation Research in Mental Health Services: An Emerging Science with Conceptual, Methodological, and Training challenges. *Adm. Policy Ment. Health Ment. Health Serv. Res.* **2009**, *36*, 24–34, doi:10.1007/s10488-008-0197-4.
9. Baird, G.; McConachie, H.; Scrutton, D. Parents' perceptions of disclosure of the diagnosis of cerebral palsy. *Arch. Dis. Child.* **2000**, *83*, 475–480, doi:10.1136/ad.83.6.475.
10. Gagliardi, A.R.; Légaré, F.; Brouwers, M.C.; Webster, F.; Badley, E.; Straus, S. Patient-mediated knowledge translation (PKT) interventions for clinical encounters: A systematic review. *Implement. Sci.* **2016**, *11*, 26–26, doi:10.1186/s13012-016-0389-3.
11. Harding, K.; Lynch, L.; Porter, J.; Taylor, N.F. Organisational benefits of a strong research culture in a health service: A systematic review. *Aust. Health Rev.* **2016**, *41*, 45–53, doi:10.1071/AH15180.
